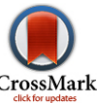

## Correction

# Correction: Childhood Cancer Incidence in British Indians & Whites in Leicester, 1996–2008

The *PLOS ONE* Staff

There is an error in the second sentence of the "Classification of cancers" sub-heading under the "Patients and Methods" section. The correct sentence for this section is:

"We further arranged the cancers into 4 subgroups (leukaemia, lymphoma, CNS tumours, all other solid tumours) based upon the International Classification of Childhood Cancer (ICD-10) system [18], corresponding respectively to its diagnostic groups I, II, III and IV–XII, as used in previous studies [11]."

## Reference

1. Sayeed S, Barnes I, Cairns BJ, Finlayson A, Ali R (2013 ) Childhood Cancer Incidence in British Indians & Whites in Leicester, 1996–2008. PLoS ONE 8(4): e61881 .doi:10.1371/journal.pone.0061881

**Citation:** The *PLOS ONE* Staff (2014) Correction: Childhood Cancer Incidence in British Indians & Whites in Leicester, 1996–2008. PLoS ONE 9(5): e98332. doi:10.1371/journal.pone.0098332

**Published:** May 20, 2014

**Copyright:** © 2014 The *PLOS ONE* Staff. This is an open-access article distributed under the terms of the Creative Commons Attribution License, which permits unrestricted use, distribution, and reproduction in any medium, provided the original author and source are credited.
